# Supplementary material
Source: publisher site journal article supplement (https://www.spandidos-publications.com/7554/downloadSupplementary)
Supplement: Supplementary file 1 [file downloadSupplementary]

Table SI. Statistical analysis outcomes for the subgroup of patients with intra-abdominal complications.

| Variable                               | Without drain (n=2) | With drain (n=7) | P-value |
|----------------------------------------|---------------------|------------------|---------|
| Intra-abdominal complication detection |                     |                  |         |
| No                                     | 2 (100.00%)         | 3 (42.85%)       | 0.4444  |
| Yes                                    | 0 (0.00%)           | 4 (57.14%)       |         |
| Postoperative day                      |                     |                  |         |
| Mean (SD)                              | 5.00 (2.83)         | 6.14 (2.73)      | 0.4446  |
| Median (Min, Max)                      | 5 (3, 7)            | 7 (1, 9)         |         |
| Drain relation                         |                     |                  |         |
| (-)                                    | 1 (50.00%)          | 3 (42.85%)       | 1.0000  |
| (+)                                    | 1 (50.00%)          | 4 (57.14%)       |         |
| Diagnosis by drain content             |                     |                  |         |
| No                                     | 1 (50.00%)          | 3 (42.85%)       | 1.0000  |
| Yes                                    | 1 (50.00%)          | 4 (57.14%)       |         |
| Diagnosis by vitals                    |                     |                  |         |
| No                                     | 1 (50.00%)          | 2 (28.57%)       | 1.0000  |
| Yes                                    | 1 (50.00%)          | 5 (71.42%)       |         |
| Diagnosis by full blood count          |                     |                  |         |
| No                                     | 2 (100.00%)         | 4 (57.14%)       | 0.5000  |
| Yes                                    | 0 (0.00%)           | 3 (42.85%)       |         |
| Prolonged length of stay               |                     |                  |         |
| No                                     | 1 (50.00%)          | 1 (14.28%)       | 0.4167  |
| Yes                                    | 1 (50.00%)          | 6 (85.71%)       |         |
| Reoperation                            |                     |                  |         |
| No                                     | 1 (50.00%)          | 4 (57.14%)       | 1.0000  |
| Yes                                    | 1 (50.00%)          | 3 (42.85%)       |         |
| Death                                  |                     |                  |         |
| No                                     | 1 (50.00%)          | 6 (85.71%)       | 0.4167  |
| Yes                                    | 1 (50.00%)          | 1 (14.28%)       |         |

For the qualitative characteristics, outcomes are presented as frequency and the relevant percentage and for quantitative characteristics is presented the median along with the minimum and maximum values. P-values were obtained using Fisher's exact test for categorical data and the Mann-Whitney U test for numeric data. SD, standard deviation.

Table SII. Statistical analysis of intra-abdominal complications: drain content as a differentiation factor.

| Variable                              | Diagnosis by other means (n=3) | Diagnosis by drain content (n=4) | P-value             |
|---------------------------------------|--------------------------------|----------------------------------|---------------------|
| Intraabdominal complication detection |                                |                                  |                     |
| No                                    | 1 (33.33%)                     | 2 (50.00%)                       | 1.0000 <sup>a</sup> |
| Yes                                   | 2 (66.66%)                     | 2 (50.00%)                       |                     |
| Postoperative day                     |                                |                                  |                     |
| Mean (SD)                             | 6.67 (2.52)                    | 5.75 (3.20)                      | 0.7137              |
| Median (Min, Max)                     | 7 (4, 9)                       | 7 (1, 8)                         |                     |
| Diagnosis by vitals                   |                                |                                  |                     |
| No                                    | 1 (33.33%)                     | 1 (25.00%)                       | 1.0000 <sup>a</sup> |
| Yes                                   | 2 (66.66%)                     | 3 (75.00%)                       |                     |
| Diagnosis by labs                     |                                |                                  |                     |
| No                                    | 2 (66.66%)                     | 2 (50.00%)                       | 1.0000 <sup>a</sup> |
| Yes                                   | 1 (33.33%)                     | 2 (50.00%)                       |                     |
| Prolonged hospitalization             |                                |                                  |                     |
| Yes                                   | 3 (100.00%)                    | 3 (75.00%)                       | 1.0000 <sup>a</sup> |
| No                                    | 0 (0.00%)                      | 1 (25.00%)                       |                     |
| Reoperation                           |                                |                                  |                     |
| No                                    | 1 (33.33%)                     | 3 (75.00%)                       | 0.4857 <sup>a</sup> |
| Yes                                   | 2 (66.66%)                     | 1 (25.00%)                       |                     |
| Death                                 |                                |                                  |                     |
| No                                    | 3 (100.00%)                    | 3 (75.00%)                       | 1.0000 <sup>a</sup> |
| Yes                                   | 0 (0.00%)                      | 1 (25.00%)                       |                     |

Results are presented as frequency and percentage or the median along with the minimum and maximum values.  
<sup>a</sup>Fisher's exact test. SD, standard deviation.

Table SIII. Pre- and intra-operative characteristics among patients without intra-abdominal complications.

| Characteristics                                               | Without drain (n=19) | With drain (n=32) | P-value             | OR and 95% CI             |
|---------------------------------------------------------------|----------------------|-------------------|---------------------|---------------------------|
| Age, years                                                    | 73.0 (48, 87)        | 73.0 (50, 83)     | 0.6327              | N/A                       |
| Sex (male)                                                    | 8 (42.11%)           | 18 (56.25%)       | 0.3286              | 0.57 (0.18-1.78)          |
| Charlson score                                                | 2 (2, 4)             | 2 (2, 5)          | 0.1118              | N/A                       |
| ECOG                                                          | 0 (0, 1)             | 0 (0, 1)          | 0.6125              | N/A                       |
| Histology                                                     |                      |                   |                     |                           |
| Diffuse                                                       | 7 (36.84%)           | 12 (37.50%)       | 0.9625              | 0.97 (0.30-3.15)          |
| Intestinal                                                    | 10 (52.63%)          | 15 (46.87%)       | 0.6909              | 1.23 (0.40-3.93)          |
| Other                                                         | 1 (5.26%)            | 5 (15.63%)        | 0.2668              | 0.30 (0.03-2.79)          |
| Location                                                      |                      |                   |                     |                           |
| Esophago-gastric junction                                     | 6 (31.57%)           | 5 (15.63%)        | 0.1805              | 2.49 (0.64-9.70)          |
| Fundus                                                        | 3 (15.79%)           | 2 (6.25%)         | 0.2680              | 0.81 (0.43-18.6)          |
| Body                                                          | 7 (36.84%)           | 13 (40.63%)       | 0.7891              | 0.85 (0.26-2.74)          |
| Antrum                                                        | 3 (15.79%)           | 11 (34.38%)       | 0.1504              | 0.36 (0.09-1.50)          |
| Pylorus                                                       | -                    | -                 | N/A                 | N/A                       |
| Positive preoperative chemotherapy CA positivity <sup>b</sup> |                      |                   |                     |                           |
| CA 19.9                                                       | 2 (10.53%)           | 6 (18.75%)        | 0.4349              | 0.51 (0.09-2.83)          |
| CA 15.3                                                       | 1 (5.26%)            | 5 (15.63%)        | 0.2668              | 0.3000<br>(0.0323-2.7854) |
| CA 125                                                        | 0 (0.00%)            | 3 (9.38%)         | 0.1689              | 0.21 (0.01-4.42)          |
| CEA                                                           | 3 (15.79%)           | 3 (9.38%)         | 0.4918              | 1.81(0.33-10.05)          |
| Intraoperative characteristics                                |                      |                   |                     |                           |
| Duration of operation, min                                    | 190<br>(120, 270)    | 203 (140, 300)    | 0.2495              | N/A                       |
| Blood transfusion                                             | 3 (15.89%)           | 4 (12.50%)        | 1.0000 <sup>a</sup> | 1.31 (0.26-6.62)          |
| Fresh frozen plasma transfusion                               | 2 (10.53%)           | 0 (0.00%)         | 0.0615              | 9.29 (0.42-204.4)         |
| Allergic reaction-drugs                                       | -                    | -                 | N/A                 | N/A                       |
| Intraoperative incidents                                      | 1 (5.26%)            | 4 (12.50%)        | 0.4008              | 0.39 (0.04-3.76)          |
| Criteria for drain placement                                  |                      |                   |                     |                           |
| Blood loss >250 ml                                            | 0 (0.00%)            | 16 (50.00%)       |                     | 0.03 (0.001-0.46)         |
| Vessel injury                                                 | 0 (0.00%)            | 1 (3.12%)         | 0.4364              | 0.54 (0.02-13.89)         |
| Anastomosis concerns                                          | 1 (5.26%)            | 8 (25.00%)        | 0.07384             | 0.17 (0.02-1.46)          |
| Adjacent structures injury                                    | -                    | -                 | N/A                 | N/A                       |
| Stump integrity concerns                                      | 0 (0.00%)            | 2 (6.25%)         | 0.5234 <sup>a</sup> | 0.31 (0.01-6.87)          |
| Chronic cardiopulmonary comorbidity                           | 0 (0.00%)            | 3 (9.38%)         | 0.2854              | 0.22 (0.01-4.42)          |

For the qualitative characteristics, outcomes are presented as frequency and the relevant percentage and for quantitative characteristics is presented the median along with the minimum and maximum values. <sup>a</sup>P-values for categorical data were obtained using Fisher's exact, otherwise it was obtained by the  $\chi^2$  test. P-values for numeric data were obtained using the Mann-Whitney U test. <sup>b</sup>CA test normal values: CA 125 (0-31 U/ml), CA 153 (0-36 U/ml), CA 19-9 (0-37 U/ml) and CEA (0-5 ng/ml) ECOG, Eastern Cooperative Oncology Group; CA, Cancer Antigen (CA 19.9, CA 15.3, CA 125); CEA, Carcinoembryonic Antigen; OR, Odds Ratio; CI, Confidence Interval; FFP, Fresh Frozen Plasma.
